# Supplementary figures and images for: Distinguishing protein-coding and noncoding genes in the human genome
Source: HighWire-hosted journal article supplement (doi:10.1073/pnas.0709013104), 2007-11-27

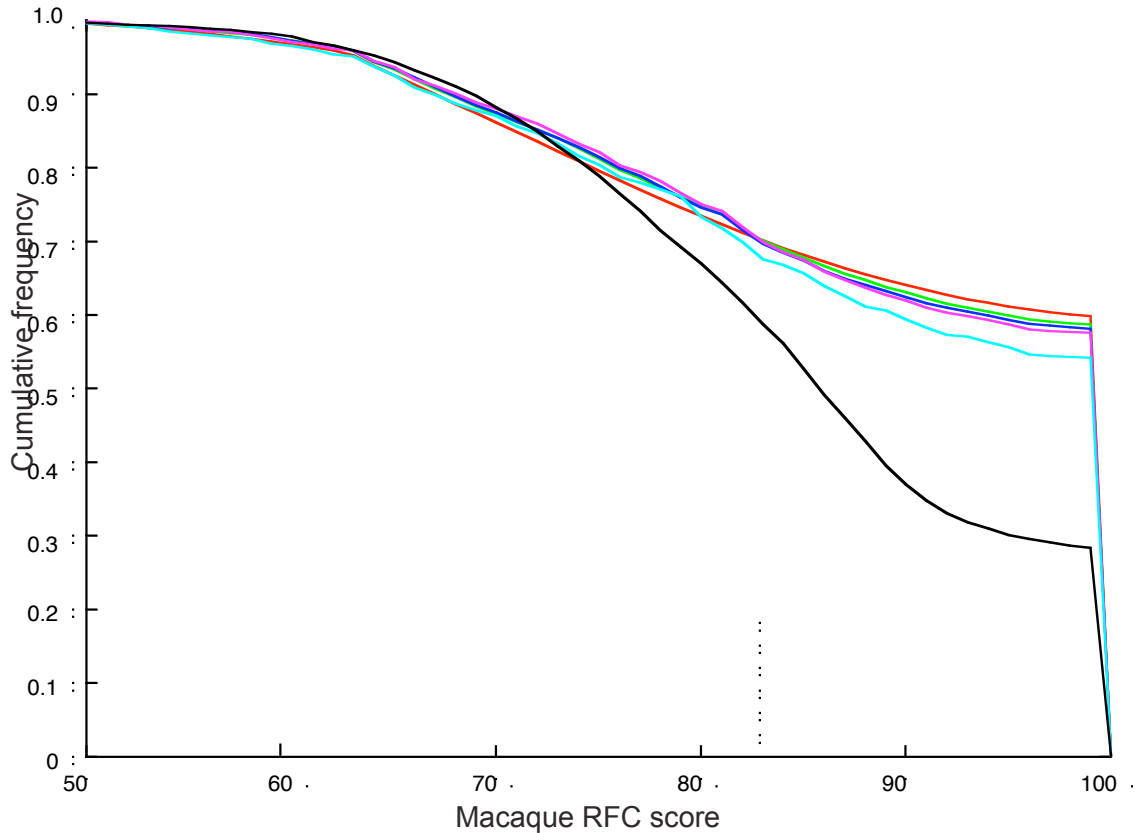

Supplement: 09013Fig8.pdf [file 09013Fig8.pdf]
